## Early extubation following cardiac surgery in adult congenital heart disease improves post-operative haemodynamics and reduces costs

G. Costola<sup>1</sup>, A. Constantine<sup>2</sup>, P. Bianchi<sup>1</sup>, S. Mele<sup>1</sup>, D. Shore<sup>2</sup>, T.C. Aw<sup>1</sup>, K. Dimopoulos<sup>2</sup>

<sup>1</sup>Royal Brompton Hospital, London, United Kingdom; <sup>2</sup>Royal Brompton Hospital Imperial College London, London, United Kingdom

**Funding Acknowledgement:** Type of funding source: None

**Background:** In paediatric cardiac surgery, there has been a paradigm shift in perioperative management from a slow wean of mechanical ventilation in the intensive care unit (ICU), to “ultra fast-track” anaesthesia with early extubation (EE) in theatre to promote a faster recovery. Adults with congenital heart disease (ACHD) have multiple risk factors for prolonged intubation, including a greater proportion of re-do interventions, more comorbidities and metabolic differences leading to slower emergence from anaesthesia. As a result, EE remains unproven and has not been widely adopted and in this patient group.

**Aim:** To assess the effects of EE on post-operative haemodynamics, hospital stay and associated healthcare costs.

**Methods:** Data were collected on ACHD patients, who underwent cardiac surgery in a high-volume tertiary centre between 2012 and 2018. Propensity score matching (1:1 or 2:1 where possible) was performed using the following variables: age, sex, body mass index, CHD complexity, functional class, length of surgery, systemic ventricular function, procedure-specific risk (adult congenital heart score; ACHS), urgent versus elective procedure, active endocarditis, pulmonary hypertension and renal dysfunction.

**Results:** 614 procedures were performed during the study period. After matching, 87 (14.2%) patients receiving EE were compared to 164 patients who received conventional care (CC). The overall complication rate was low, with no difference between the EE and CC groups (8.0% vs. 9.1%,  $p=0.77$ ), and a very low reintubation rate (<1%). EE patients had a significantly shorter post-operative hospital length of stay in ICU and the high dependency unit (HDU; 48 [43–51] vs. 50 [47–69] hours,  $p<0.0001$ ). EE patients required less inotropic & vasopressor support, as demonstrated by a lower Vasoactive-Inotropic Score (VIS) compared to patients following NEE (median VIS 0.5 [0.0–1.8] vs. 2.0 [0.0–3.5],  $p<0.0001$ ). The total fluid balance by the third post-operative day was more positive after CC than EE (1177±737mL vs. 927±780mL,  $p=0.004$ ). Finally, lower combined ICU and HDU costs were incurred by EE compared with CC (£3.9K[2.8–4.2K] vs. £4.2K[3.9–6.3K],  $p<0.0001$ ).

**Conclusion:** In ACHD patients undergoing cardiac surgery, including complex and redo procedures, EE was safe, associated with a shorter ITU and HDU stay and lower hospital costs.

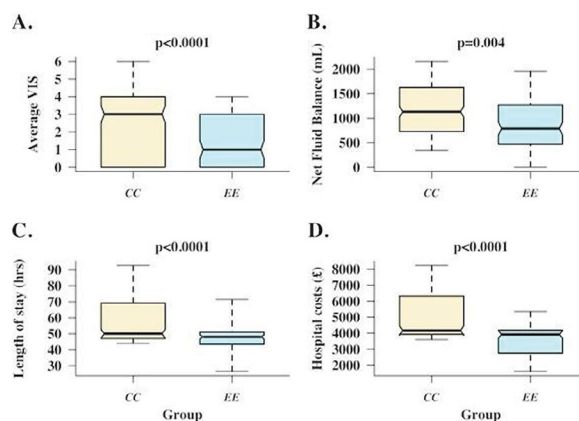

Source: http://academic.oup.com/eurheartj/article-pdf/41/Supplement_2/ehaa946.2202/34520440/ehaa946.2202.pdf
